# Supplementary material for: Plasmodium falciparum dihydroartemisinin-piperaquine failures in Cambodia are associated with mutant K13 parasites presenting high survival rates in novel piperaquine in vitro assays: retrospective and prospective investigations
Source: PubMed Central journal article supplement (PMC4688949; doi:10.1186/s12916-015-0539-5), 2015-12-22
Supplement: 12916_2015_539_MOESM1_ESM.pdf [file 12916_2015_539_MOESM1_ESM.pdf]

| Patient ID | Site (province) | Age (years) | Sex | Parasitemia at day 0 (/mm <sup>3</sup> ) | Clinical outcome at day 42 <sup>1</sup> | K13 allele <sup>2</sup> | Day of recrudescence | Parasitemia at day of recrudescence (/mm <sup>3</sup> ) | RSA survival rate (%) <sup>3</sup> | PSA survival rate (%) <sup>4</sup> | IC <sub>50</sub> PP (nM) | IC <sub>50</sub> CQ (nM) | IC <sub>50</sub> DHA (nM) | IC <sub>50</sub> MQ (nM) |
|------------|-----------------|-------------|-----|------------------------------------------|-----------------------------------------|-------------------------|----------------------|---------------------------------------------------------|------------------------------------|------------------------------------|--------------------------|--------------------------|---------------------------|--------------------------|
| 6246       | Kampong Speu    | 18          | M   | 100.804                                  | Non recrudescent                        | C580Y                   | -                    | -                                                       | 15.2                               | 37.0                               | NI                       | 61                       | 0.48                      | 39.8                     |
| 6293       | Battambang      | 19          | M   | 13.936                                   | Non recrudescent                        | C580Y                   | -                    | -                                                       | 11.5                               | 39.4                               | NI                       | 185                      | 0.45                      | 35.5                     |
| 6391       | Battambang      | 18          | M   | 47.070                                   | Non recrudescent                        | C580Y                   | -                    | -                                                       | 12.3                               | 39.4                               | NI                       | 668                      | 0.83                      | 7.5                      |
| 6218       | Battambang      | 19          | M   | 47.179                                   | Non recrudescent                        | C580Y                   | -                    | -                                                       | 14.7                               | 40.8                               | NI                       | 39                       | 0.25                      | 11.3                     |
| 6443       | Battambang      | 20          | F   | 114,500                                  | Non recrudescent                        | C580Y                   | -                    | -                                                       | 7.3                                | 49.6                               | NI                       | 277                      | 2.13                      | NI                       |
| 6430       | Battambang      | 44          | F   | 4,010                                    | Non recrudescent                        | C580Y                   | -                    | -                                                       | 10.2                               | 51.4                               | NI                       | 338                      | 0.54                      | NI                       |
| 6429       | Pursat          | 18          | M   | 7,943                                    | Non recrudescent                        | C580Y                   | -                    | -                                                       | 22.8                               | 51.8                               | NI                       | 387                      | 0.74                      | 28.3                     |
| 6394       | Battambang      | 31          | F   | 10,945                                   | Non recrudescent                        | C580Y                   | -                    | -                                                       | 5.5                                | 56.8                               | NI                       | NA                       | NA                        | NI                       |
| 6408       | Battambang      | 19          | F   | 1,572                                    | Non recrudescent                        | C580Y                   | -                    | -                                                       | 9.6                                | 58.7                               | NI                       | 183                      | 1.68                      | 24.0                     |
| 6411       | Battambang      | 11          | F   | 23,114                                   | Non recrudescent                        | C580Y                   | -                    | -                                                       | 14.0                               | 71.6                               | NI                       | 308                      | 0.89                      | 28.9                     |
| 6427       | Battambang      | 19          | F   | 9,117                                    | Non recrudescent                        | C580Y                   | -                    | -                                                       | 22.8                               | 77.4                               | NI                       | 358                      | 1.92                      | 15.4                     |
| 6273       | Kampong Speu    | 21          | M   | 17,822                                   | Non recrudescent                        | C580Y                   | -                    | -                                                       | 14.5                               | 0.3                                | 6.1                      | 181                      | 2.49                      | 55.1                     |
| 6337       | Kampong Speu    | 26          | M   | 2,064                                    | Non recrudescent                        | C580Y                   | -                    | -                                                       | 19.3                               | 0.4                                | 53.3                     | 215                      | 1.79                      | 91.4                     |
| 6403       | Pursat          | 12          | M   | 55,663                                   | Non recrudescent                        | C580Y                   | -                    | -                                                       | 7.3                                | 0.6                                | 7.1                      | 159                      | 1.64                      | 33.1                     |
| 6267       | Kampong Speu    | 15          | M   | 13,628                                   | Non recrudescent                        | C580Y                   | -                    | -                                                       | 11.1                               | 0.6                                | 7.6                      | 289                      | 2.14                      | 117.4                    |
| 6349       | Kampong Thom    | 18          | M   | 40,493                                   | Non recrudescent                        | C580Y                   | -                    | -                                                       | 13.7                               | 0.7                                | 43.4                     | 56                       | 2.42                      | 97.8                     |
| 6237       | Kampong Thom    | 19          | M   | 10,348                                   | Non recrudescent                        | C580Y                   | -                    | -                                                       | 11.5                               | 0.8                                | 37.2                     | 18                       | 0.48                      | 32.1                     |
| 6410       | Battambang      | 29          | F   | 126,701                                  | Non recrudescent                        | C580Y                   | -                    | -                                                       | 15.4                               | 6.0                                | 104.3                    | 303                      | 0.88                      | 18.4                     |
| 6369       | Pursat          | 10          | M   | 38,854                                   | Non recrudescent                        | C580Y                   | -                    | -                                                       | 10.5                               | 6.4                                | 52.1                     | 213                      | 0.83                      | 32.2                     |
| 6341       | Pursat          | 26          | F   | 1,662                                    | Non recrudescent                        | C580Y                   | -                    | -                                                       | 8.4                                | 25.8                               | 37.2                     | 84                       | 0.89                      | 36.3                     |
| 6286       | Battambang      | 12          | M   | 401                                      | Non recrudescent                        | C580Y                   | -                    | -                                                       | 17.4                               | 53.5                               | 44.2                     | 57                       | 0.72                      | 19.3                     |
| 6395       | Battambang      | 11          | M   | 83,612                                   | Recrudescent                            | C580Y                   | 35                   | 4,458                                                   | 12.8                               | 19.3                               | NI                       | 131                      | 1.18                      | 15.4                     |
| 6280       | Battambang      | 18          | M   | 1,594                                    | Recrudescent                            | C580Y                   | 21                   | 79                                                      | 30.6                               | 29.0                               | NI                       | 124                      | 0.48                      | 24.8                     |
| 6272       | Battambang      | 45          | M   | 118,252                                  | Recrudescent                            | C580Y                   | 35                   | 27,421                                                  | 11.0                               | 40.1                               | NI                       | 440                      | 0.83                      | 11.6                     |
| 6302       | Battambang      | 20          | M   | 4,539                                    | Recrudescent                            | C580Y                   | 35                   | 597                                                     | 7.2                                | 42.5                               | NI                       | 148                      | 0.71                      | 32.2                     |
| 6229       | Battambang      | 19          | M   | 2,640                                    | Recrudescent                            | C580Y                   | 21                   | 492                                                     | 21.1                               | 46.7                               | NI                       | 552                      | 1.01                      | 19.4                     |
| 6224       | Pursat          | 22          | M   | 7,938                                    | Recrudescent                            | C580Y                   | 14                   | NA                                                      | 22.0                               | 61.5                               | NI                       | 33                       | 0.23                      | 19.9                     |
| 6431       | Battambang      | 13          | M   | 73,418                                   | Recrudescent                            | C580Y                   | 21                   | 157                                                     | 4.9                                | 61.5                               | NI                       | 482                      | 1.03                      | NI                       |
| 6320       | Battambang      | 24          | M   | 28,455                                   | Recrudescent                            | C580Y                   | 42                   | 5,426                                                   | 18.9                               | 62.1                               | NI                       | 232                      | 1.43                      | 22.2                     |
| 6261       | Pursat          | 12          | F   | 72,919                                   | Recrudescent                            | C580Y                   | 28                   | NA                                                      | 20.4                               | 70.6                               | NI                       | 166                      | 0.81                      | 21.7                     |
| 6365       | Battambang      | 41          | F   | 7,384                                    | Recrudescent                            | C580Y                   | 28                   | 18,817                                                  | 5.5                                | 51.9                               | 42.4                     | 150                      | 0.58                      | 9.8                      |
| 6219       | Battambang      | 19          | F   | 143,700                                  | Recrudescent                            | C580Y                   | 21                   | 10,432                                                  | 15.2                               | 58.7                               | 68.8                     | 78                       | 0.86                      | 18.3                     |

<sup>1</sup> For each patient, the clinical outcome was evaluated at day 42, after PCR-correction (distinction between reinfection and recrudescence in case of *P. falciparum* recurrent infections) according to the 2009 WHO protocol.

<sup>2</sup> Mutation in the propeller domain of the k13 gene was assessed by nested PCR and sequencing (see ref 18).

<sup>3</sup> RSA<sup>0-3h</sup> was performed as previously described (see ref 10). In-vitro RSA assays were considered as interpretable if the growth rate in non-exposed culture (parasitemia at 72h/parasitemia at 0h) was  $\geq 1.5$ . The limit of detection of viable parasites was estimated 0.1% parasitemia (number of red blood cells counted by each microscopist = 20,000 and average parasitemia in non-exposed = 5%).

<sup>4</sup> PSA survival rates (%) are expressed as the median of the survival rates (expressed as percent of viable parasites). In-vitro PSA assays were considered as interpretable if the growth rate in non-exposed culture (parasitemia at 72h/parasitemia at 0h) were  $> 1.5$ . The limit of detection of viable parasites was estimated 0.1% parasitemia (number of red blood cells counted by each microscopist = 20,000 and average parasitemia in non-exposed = 5%).

NI : Non-interpretable curves ; NA : Not available data.

IC<sub>50</sub> PP: Inhibitory concentration 50% for piperazine; IC<sub>50</sub> CQ: Inhibitory concentration 50% for chloroquine; IC<sub>50</sub> DHA: Inhibitory concentration 50% for dihydroartemisinin; IC<sub>50</sub>

MQ: Inhibitory concentration 50% for mefloquine.
