# Supplementary material for: Plasmodium falciparum dihydroartemisinin-piperaquine failures in Cambodia are associated with mutant K13 parasites presenting high survival rates in novel piperaquine in vitro assays: retrospective and prospective investigations
Source: PubMed Central journal article supplement (PMC4688949; doi:10.1186/s12916-015-0539-5), 2015-12-22
Supplement: 12916_2015_539_MOESM2_ESM.pdf [file 12916_2015_539_MOESM2_ESM.pdf]

| <b>Patient ID</b> | <b>Site</b> | <b>Age (years)</b> | <b>Sex</b> | <b>PCR_corrected clinical outcome at day 42 <sup>1</sup></b> | <b>Day of recrudescence</b> | <b>Day 0 isolate K13 allele <sup>2</sup></b> | <b>Ex-vivo PSA survival rate (%) <sup>3</sup></b> | <b>K13 and ex-vivo PSA classification <sup>4</sup></b> |
|-------------------|-------------|--------------------|------------|--------------------------------------------------------------|-----------------------------|----------------------------------------------|---------------------------------------------------|--------------------------------------------------------|
| 6960              | Mondulkiri  | 37                 | M          | Non recrudescent                                             | -                           | C580Y                                        | 0.12                                              | Group 1                                                |
| 6904              | Mondulkiri  | 20                 | M          | Non recrudescent                                             | -                           | Wild type 3D7                                | 0.12                                              | Group 0                                                |
| 6978              | Mondulkiri  | 33                 | M          | Non recrudescent                                             | -                           | Wild type 3D7                                | 0.12                                              | Group 0                                                |
| 6885              | Ratanakiri  | 32                 | F          | Non recrudescent                                             | -                           | Wild type 3D7                                | 0.12                                              | Group 0                                                |
| 6973              | Mondulkiri  | 30                 | M          | Non recrudescent                                             | -                           | C580Y                                        | 0.13                                              | Group 1                                                |
| 6880              | Ratanakiri  | 29                 | F          | Non recrudescent                                             | -                           | Wild type 3D7                                | 0.13                                              | Group 0                                                |
| 6845              | Rattanakiri | 5                  | F          | Non recrudescent                                             | -                           | Wild type 3D7                                | 0.14                                              | Group 0                                                |
| 6847              | Rattanakiri | 25                 | M          | Non recrudescent                                             | -                           | Wild type 3D7                                | 0.14                                              | Group 0                                                |
| 6857              | Rattanakiri | 20                 | F          | Non recrudescent                                             | -                           | Wild type 3D7                                | 0.14                                              | Group 0                                                |
| 6952              | Stungtremg  | 22                 | M          | Non recrudescent                                             | -                           | Wild type 3D7                                | 0.14                                              | Group 0                                                |
| 6866              | Rattanakiri | 8                  | M          | Non recrudescent                                             | -                           | Wild type 3D7                                | 0.15                                              | Group 0                                                |
| 6881              | Rattanakiri | 28                 | M          | Non recrudescent                                             | -                           | Wild type 3D7                                | 0.15                                              | Group 0                                                |
| 6853              | Rattanakiri | 3                  | M          | Non recrudescent                                             | -                           | Wild type 3D7                                | 0.15                                              | Group 0                                                |
| 6888              | Rattanakiri | 45                 | M          | Non recrudescent                                             | -                           | Wild type 3D7                                | 0.15                                              | Group 0                                                |
| 6868              | Rattanakiri | 20                 | F          | Non recrudescent                                             | -                           | Wild type 3D7                                | 0.15                                              | Group 0                                                |
| 6878              | Rattanakiri | 29                 | M          | Non recrudescent                                             | -                           | Wild type 3D7                                | 0.15                                              | Group 0                                                |
| 6926              | Stungtremg  | 24                 | M          | Non recrudescent                                             | -                           | Wild type 3D7                                | 0.15                                              | Group 0                                                |
| 6879              | Rattanakiri | 12                 | M          | Non recrudescent                                             | -                           | Wild type 3D7                                | 0.16                                              | Group 0                                                |
| 6883              | Rattanakiri | 18                 | M          | Non recrudescent                                             | -                           | Wild type 3D7                                | 0.16                                              | Group 0                                                |
| 6831              | Rattanakiri | 55                 | M          | Non recrudescent                                             | -                           | Wild type 3D7                                | 0.16                                              | Group 0                                                |
| 6886              | Rattanakiri | 11                 | M          | Non recrudescent                                             | -                           | Wild type 3D7                                | 0.16                                              | Group 0                                                |
| 6843              | Rattanakiri | 4                  | M          | Non recrudescent                                             | -                           | Wild type 3D7                                | 0.16                                              | Group 0                                                |
| 6903              | Stungtremg  | 13                 | M          | Non recrudescent                                             | -                           | Wild type 3D7                                | 0.16                                              | Group 0                                                |
| 6930              | Mondulkiri  | 26                 | M          | Non recrudescent                                             | -                           | C580Y                                        | 0.17                                              | Group 1                                                |
| 6956              | Mondulkiri  | 20                 | M          | Non recrudescent                                             | -                           | Wild type 3D7                                | 0.17                                              | Group 0                                                |
| 6884              | Rattanakiri | 16                 | F          | Non recrudescent                                             | -                           | Wild type 3D7                                | 0.17                                              | Group 0                                                |
| 6867              | Rattanakiri | 15                 | F          | Non recrudescent                                             | -                           | Wild type 3D7                                | 0.17                                              | Group 0                                                |
| 6862              | Rattanakiri | 23                 | M          | Non recrudescent                                             | -                           | Wild type 3D7                                | 0.17                                              | Group 0                                                |
| 6842              | Rattanakiri | 18                 | F          | Non recrudescent                                             | -                           | Wild type 3D7                                | 0.18                                              | Group 0                                                |

|      |             |    |   |                  |    |               |       |         |
|------|-------------|----|---|------------------|----|---------------|-------|---------|
| 6936 | Mondulkiri  | 24 | M | Non recrudescent | -  | C580Y         | 0.19  | Group 1 |
| 6836 | Rattanakiri | 11 | F | Non recrudescent | -  | Wild type 3D7 | 0.19  | Group 0 |
| 6933 | Stungtreng  | 57 | M | Non recrudescent | -  | Wild type 3D7 | 0.19  | Group 0 |
| 6875 | Rattanakiri | 13 | F | Non recrudescent | -  | Wild type 3D7 | 0.20  | Group 0 |
| 7018 | Mondulkiri  | 34 | M | Non recrudescent | -  | Wild type 3D7 | 0.24  | Group 0 |
| 6931 | Mondulkiri  | 15 | M | Non recrudescent | -  | C580Y         | 0.26  | Group 1 |
| 7002 | Mondulkiri  | 11 | F | Non recrudescent | -  | C580Y         | 0.36  | Group 1 |
| 6950 | Mondulkiri  | 26 | M | Non recrudescent | -  | C580Y         | 0.44  | Group 1 |
| 6949 | Mondulkiri  | 50 | M | Non recrudescent | -  | C580Y         | 0.59  | Group 1 |
| 6945 | Siemreap    | 32 | M | Non recrudescent | -  | C580Y         | 0.72  | Group 1 |
| 6944 | Siemreap    | 31 | M | Non recrudescent | -  | C580Y         | 4.28  | Group 1 |
| 6858 | Rattanakiri | 7  | M | Non recrudescent | -  | C580Y         | 4.31  | Group 1 |
| 6967 | Stungtreng  | 25 | M | Non recrudescent | -  | C580Y         | 4.72  | Group 1 |
| 6928 | Siemreap    | 33 | M | Non recrudescent | -  | C580Y         | 18.96 | Group 2 |
| 6998 | Siemreap    | 23 | M | Non recrudescent | -  | Y493H         | 25.73 | Group 2 |
| 6927 | Siemreap    | 37 | M | Non recrudescent | -  | C580Y         | 28.56 | Group 2 |
| 7025 | Siemreap    | 37 | M | Non recrudescent | -  | C580Y         | 38.98 | Group 2 |
| 6990 | Siemreap    | 40 | M | Non recrudescent | -  | C580Y         | 43.67 | Group 2 |
| 6882 | Rattanakiri | 20 | M | Non recrudescent | -  | C580Y         | 61.60 | Group 2 |
| 6985 | Stungtreng  | 14 | M | Non recrudescent | -  | C580Y         | 77.25 | Group 2 |
| 6905 | Stungtreng  | 26 | M | Non recrudescent | -  | C580Y         | 88.17 | Group 2 |
| 6953 | Mondulkiri  | 17 | M | Recrudescent     | 29 | C580Y         | 9.17  | Group 2 |
| 6961 | Siemreap    | 16 | M | Recrudescent     | 21 | C580Y         | 16.65 | Group 2 |
| 6859 | Rattanakiri | 45 | M | Recrudescent     | 19 | C580Y         | 17.11 | Group 2 |
| 6979 | Mondulkiri  | 18 | M | Recrudescent     | 38 | C580Y         | 20.34 | Group 2 |
| 6910 | Stungtreng  | 17 | M | Recrudescent     | 21 | C580Y         | 20.93 | Group 2 |
| 6993 | Siemreap    | 22 | M | Recrudescent     | 21 | C580Y         | 23.85 | Group 2 |
| 6929 | Mondulkiri  | 21 | M | Recrudescent     | 26 | C580Y         | 25.20 | Group 2 |
| 6977 | Stungtreng  | 60 | M | Recrudescent     | 28 | C580Y         | 26.46 | Group 2 |
| 7001 | Siemreap    | 20 | M | Recrudescent     | 20 | C580Y         | 29.01 | Group 2 |
| 6913 | Siemreap    | 19 | M | Recrudescent     | 35 | C580Y         | 31.79 | Group 2 |
| 6946 | Stungtreng  | 39 | M | Recrudescent     | 28 | C580Y         | 33.07 | Group 2 |

|                   |             |    |   |               |    |               |        |         |
|-------------------|-------------|----|---|---------------|----|---------------|--------|---------|
| 7004              | Stungtreng  | 14 | M | Recrudescence | 28 | C580Y         | 36.45  | Group 2 |
| 6971              | Siemreap    | 22 | M | Recrudescence | 26 | C580Y         | 41.96  | Group 2 |
| 7000              | Siemreap    | 34 | M | Recrudescence | 42 | C580Y         | 42.34  | Group 2 |
| 6943              | Stungtreng  | 52 | M | Recrudescence | 28 | C580Y         | 43.29  | Group 2 |
| 6834              | Rattanakiri | 14 | M | Recrudescence | 22 | C580Y         | 46.79  | Group 2 |
| 6901              | Stungtreng  | 15 | M | Recrudescence | 28 | C580Y         | 51.73  | Group 2 |
| 6863              | Rattanakiri | 18 | M | Recrudescence | 40 | C580Y         | 55.56  | Group 2 |
| 6994              | Mondulkiri  | 28 | M | Recrudescence | 30 | C580Y         | 59.67  | Group 2 |
| 6907              | Siemreap    | 22 | M | Recrudescence | 21 | C580Y         | 61.51  | Group 2 |
| 6887              | Rattanakiri | 45 | M | Recrudescence | 42 | C580Y         | 62.86  | Group 2 |
| 6968              | Siemreap    | 48 | M | Recrudescence | 42 | C580Y         | 90.03  | Group 2 |
| 6914 <sup>5</sup> | Siemreap    | 23 | M | Recrudescence | 28 | Wild type 3D7 | 102.36 |         |
| 6996              | Siemreap    | 32 | M | Recrudescence | 21 | C580Y         | 108.92 | Group 2 |

<sup>1</sup> For each patient, the clinical outcome was evaluated at day 42, after PCR-correction (distinction between reinfection and recrudescence in case of *P. falciparum* recurrent infections) according to the 2009 WHO protocol.

<sup>2</sup> Mutation in the propeller domain of the k13 gene was assessed by nested PCR and sequencing (see ref 18).

<sup>3</sup> PSA survival rates (%) are expressed as the median of the survival rates (expressed as percent of viable parasites). Ex-vivo PSA assays were considered as interpretable if the growth rate in non-exposed culture (parasitemia at 72h/parasitemia at 0h) was  $\geq 1$ . The limit of detection of viable parasites was estimated 0.1% parasitemia (number of red blood cells counted by each microscopist = 20,000 and average parasitemia in non-exposed = 5%).

<sup>4</sup> Classification of the day 0 isolates was done according to the following definition (see figure 3): Group 0 = patients harboring parasites with wild-type K13 allele and PSA ex-vivo survival rate < 10% at day 0; Group 1 = patients harboring parasites with mutant K13 allele and PSA ex-vivo survival rate < 10% at day 0 and Group 2 = patients harboring parasites with mutant K13 allele and PSA ex-vivo survival rate  $\geq 10\%$  at day 0. Patient # 6914 was unclassified.

<sup>5</sup> Day 0 isolate of the patient # 6914 was genotyped for K13 as wild-type 3D7 allele but the RSA<sup>0-3h</sup> survival rate, performed as previously (see appendix 1) on the same isolate was estimated to 16.9%, and considered as artemisinin resistant parasites (see ref 10).
