# Supplementary material for: Plasmodium falciparum dihydroartemisinin-piperaquine failures in Cambodia are associated with mutant K13 parasites presenting high survival rates in novel piperaquine in vitro assays: retrospective and prospective investigations
Source: PubMed Central journal article supplement (PMC4688949; doi:10.1186/s12916-015-0539-5), 2015-12-22

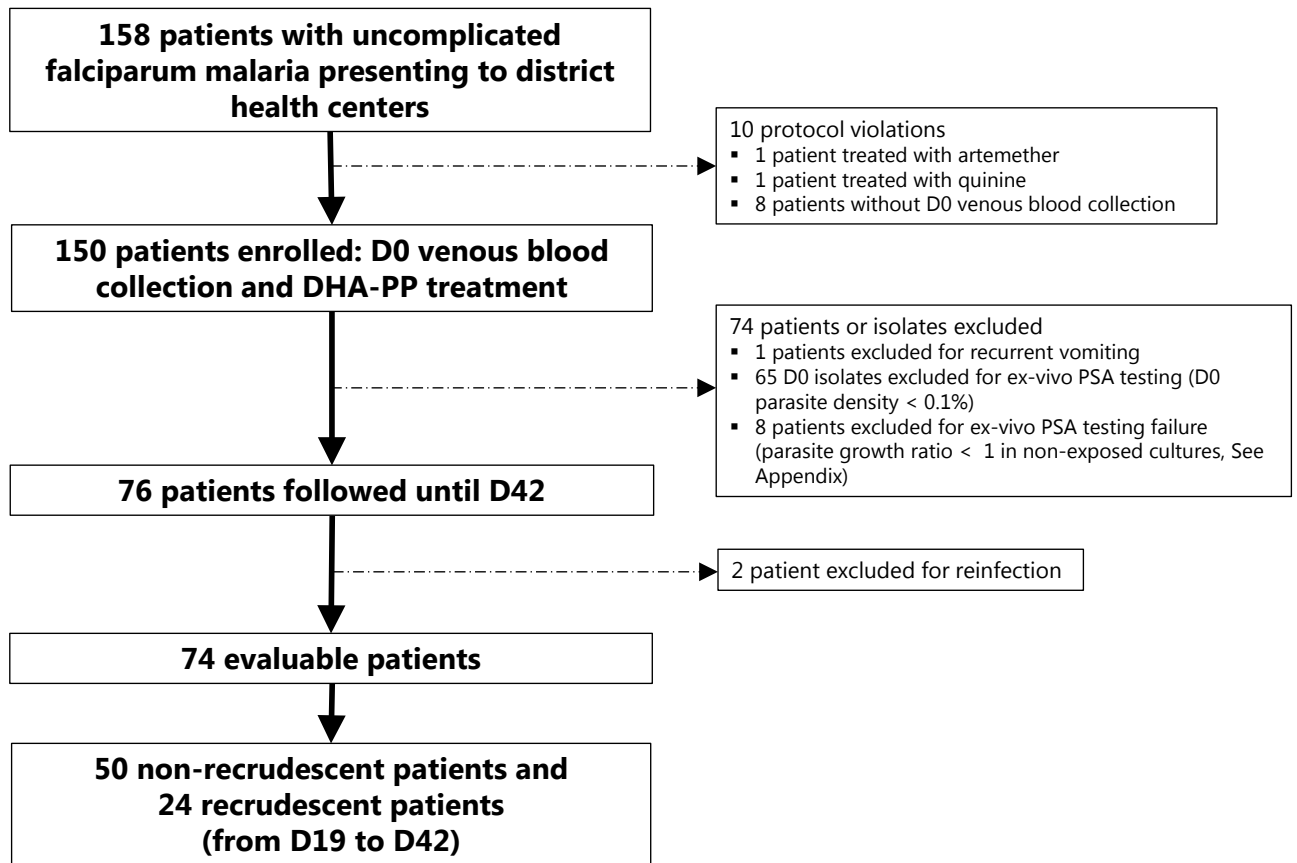

Supplement: 12916_2015_539_MOESM4_ESM.pdf [file 12916_2015_539_MOESM4_ESM.pdf]
