# Supplementary material for: Plasmodium falciparum dihydroartemisinin-piperaquine failures in Cambodia are associated with mutant K13 parasites presenting high survival rates in novel piperaquine in vitro assays: retrospective and prospective investigations
Source: PubMed Central journal article supplement (PMC4688949; doi:10.1186/s12916-015-0539-5), 2015-12-22
Supplement: 12916_2015_539_MOESM5_ESM.pdf [file 12916_2015_539_MOESM5_ESM.pdf]

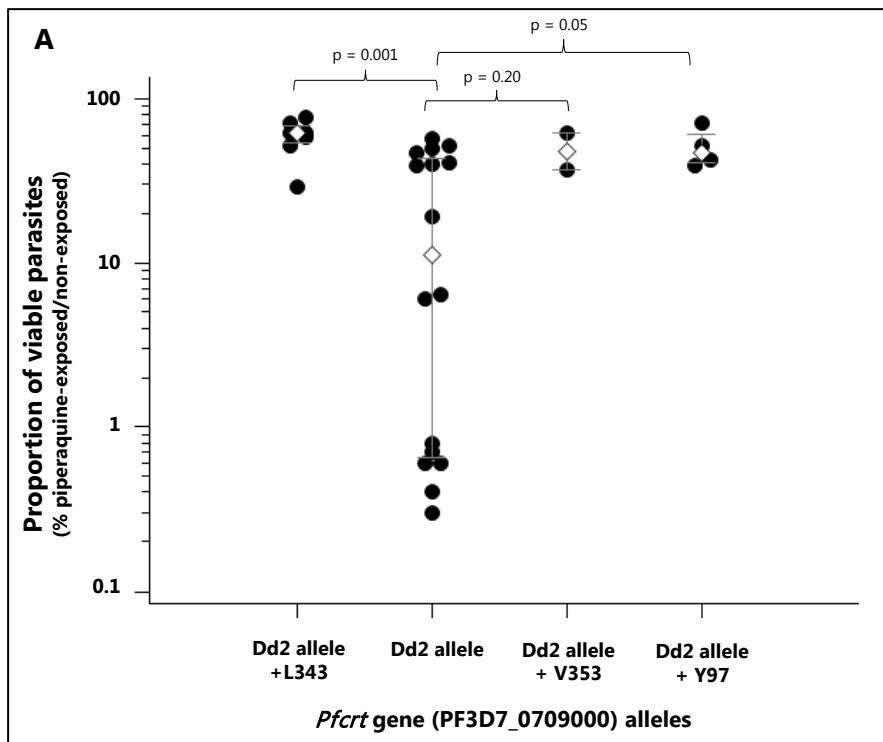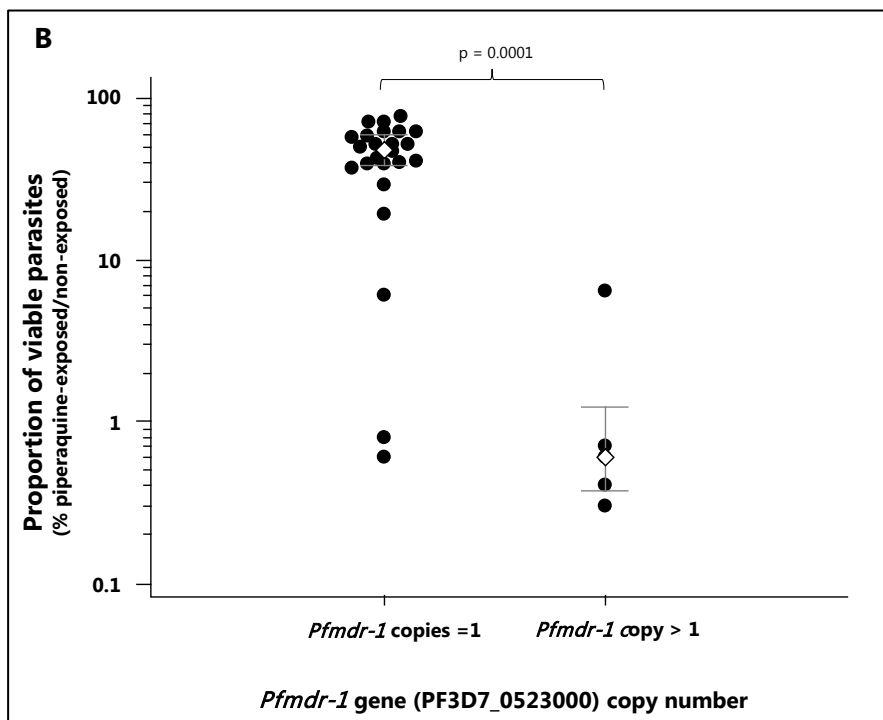

*P*-values for Mann-Whitney *U* test. The open diamonds, the horizontal lines and *I* bars represent the medians and interquartile ranges. All isolates with *Pfmdr-1* > 1 copy are piperazine-sensitive (*in-vitro* PSA survival rate <10%) but isolates with single-copy *Pfmdr-1* are not all piperazine-resistant (*in-vitro* PSA survival rate  $\geq$ 10%).
